# Supplementary material for: SLAMF7 modulates B cells and adaptive immunity to regulate susceptibility to CNS autoimmunity
Source: PubMed Central journal article supplement (PMC9533612; doi:10.1186/s12974-022-02594-9), 2022-10-03
Supplement: 12974_2022_2594_MOESM1_ESM.pdf [file 12974_2022_2594_MOESM1_ESM.pdf]

A

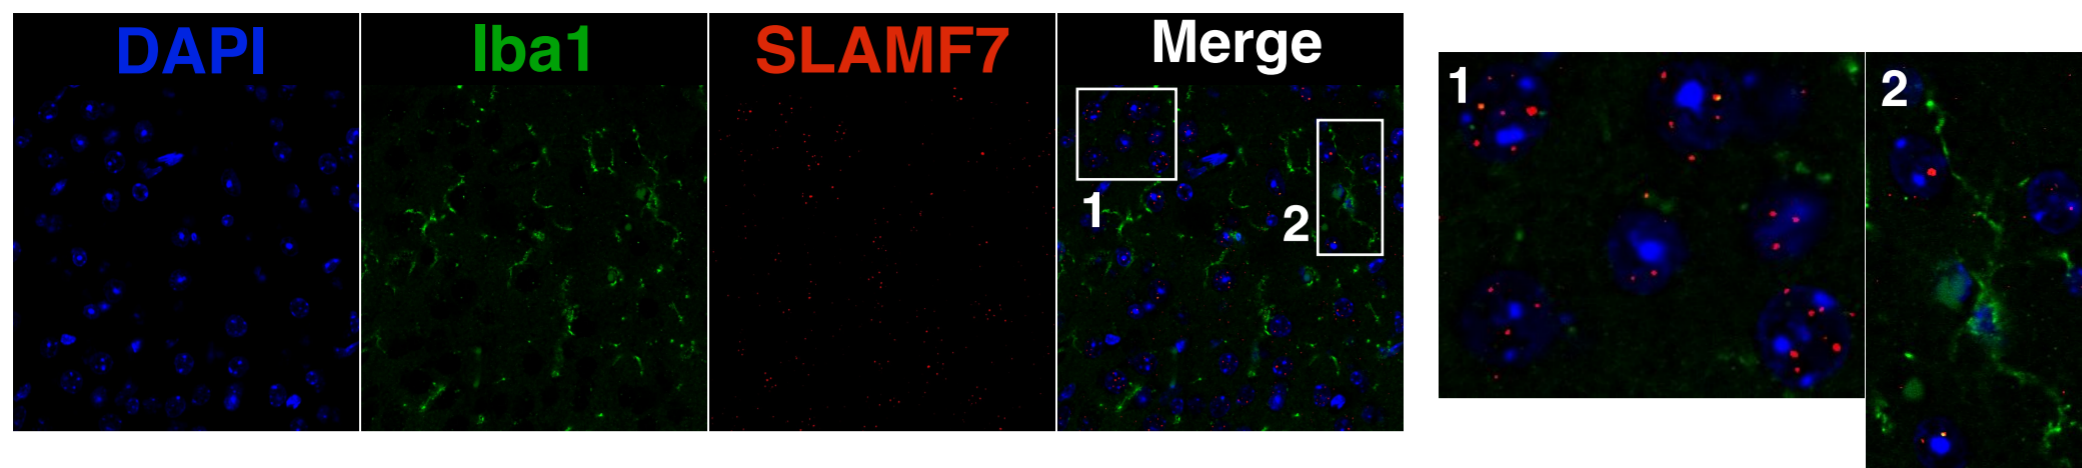

B

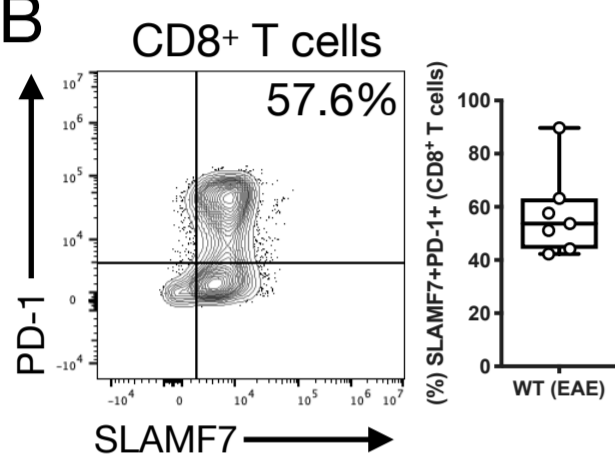

C

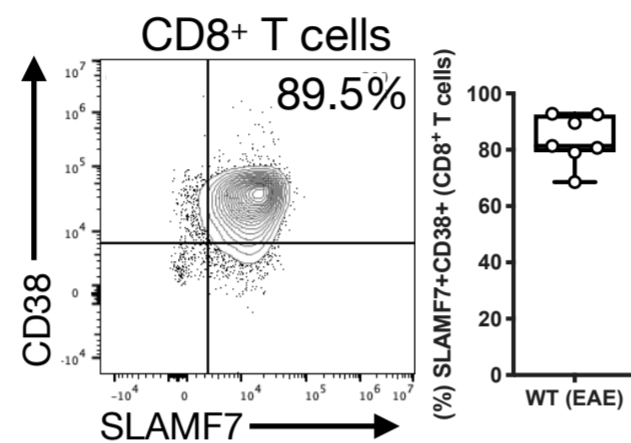

D

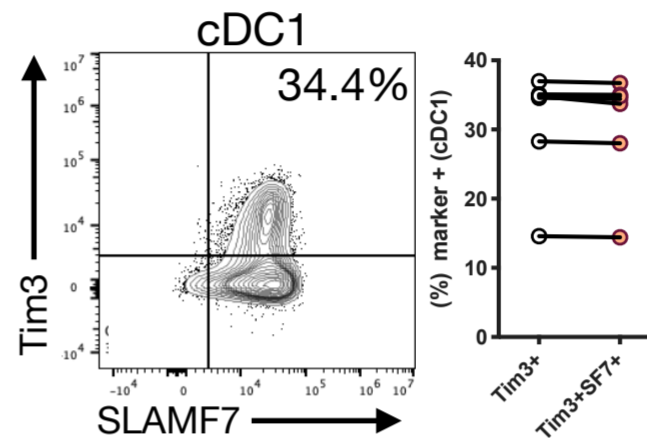

E

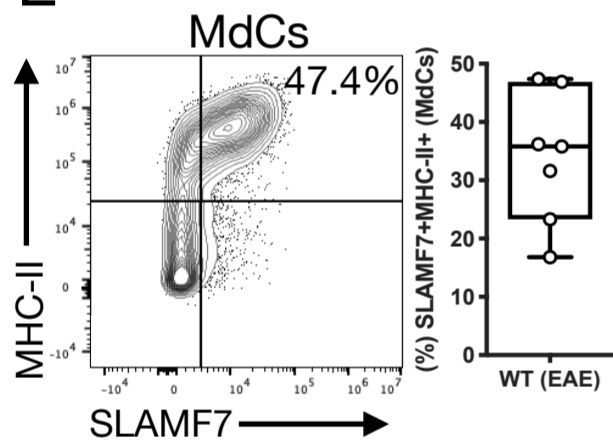

F

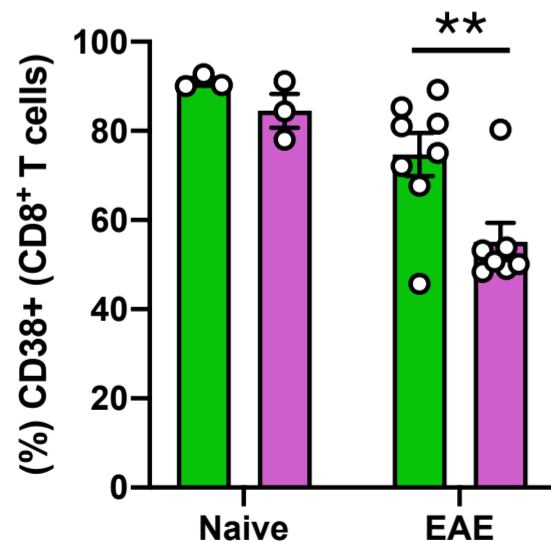

G

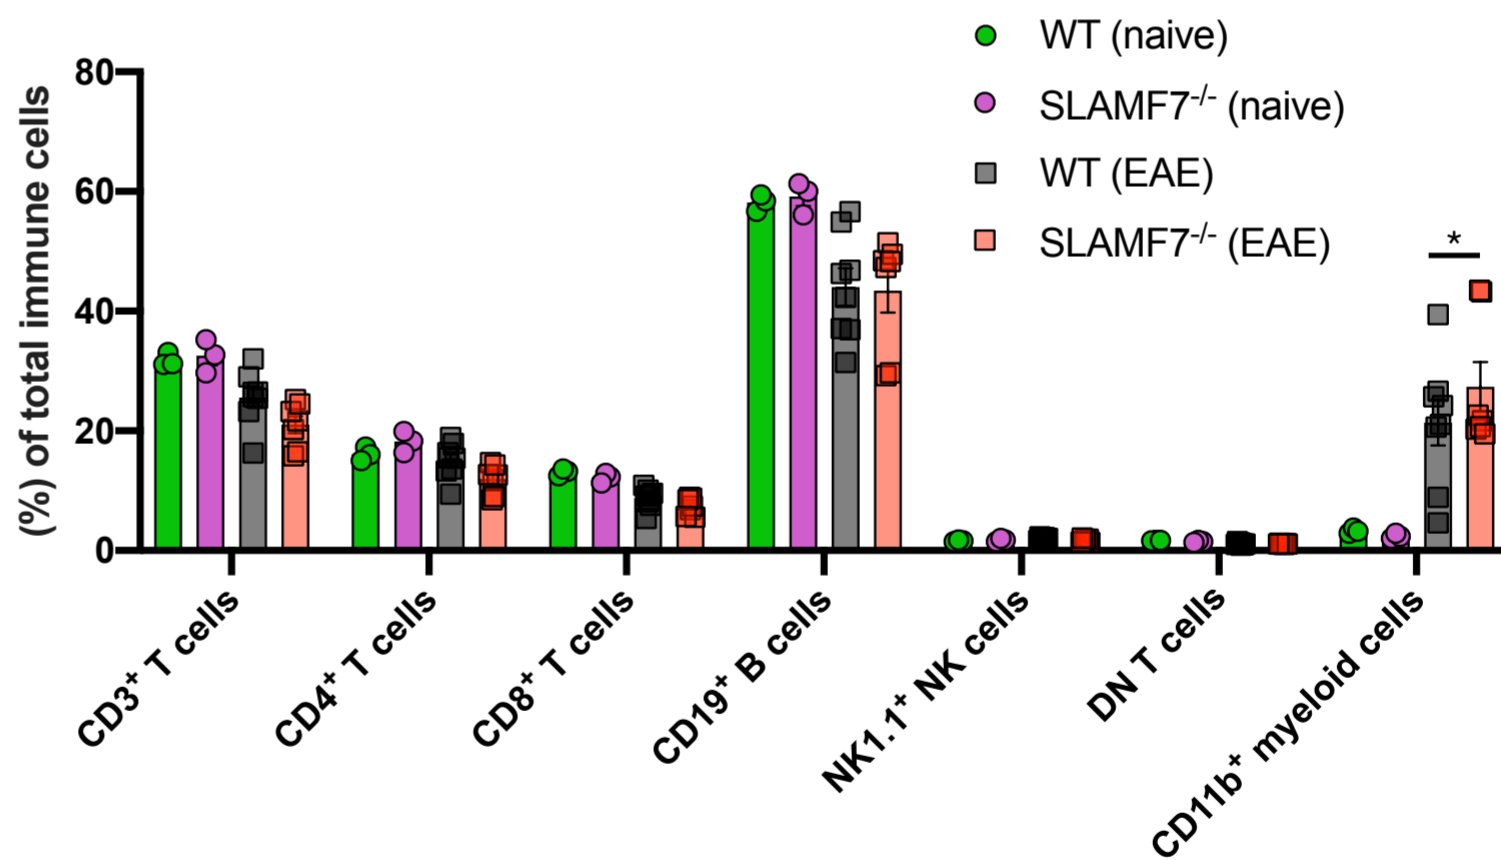

**Figure S1.** (A) Confocal imaging of SLAMF7 and Iba1 on mouse brain tissue during peak EAE. Magnifications 1 and 2 highlight regions with SLAMF7<sup>+</sup> Iba1<sup>-</sup> non-microglial cells and SLAMF7<sup>-</sup> Iba1<sup>+</sup> microglia, respectively. (B-E) Notable co-expression patterns of SLAMF7 with other regulatory markers on various CNS immune cell subsets during EAE. (B) Co-expression of SLAMF7 and PD-1 on CD8<sup>+</sup> T cells, (C) SLAMF7 co-expression with CD38 on CD8<sup>+</sup> T cells, (D) co-expression of SLAMF7 and Tim-3 on cDC1 cells, (E) co-expression of MHC-II and SLAMF7 on MdCs. (F) CD38 expression on CNS CD8<sup>+</sup> T cells. (G) Splenic immune cell subset frequencies in naive WT (N=3), naive SLAMF7<sup>-/-</sup> (n=3), WT EAE (n=8), and SLAMF7<sup>-/-</sup> EAE (n=7) mice. Groups in (F, G) compared with a two-way ANOVA with FDR correction for multiple comparisons via Benjamini and Hochberg method. \*p<0.05, \*\*p<0.01. MdCs, myeloid-derived cells.

A

Starting from  
clean, living  
CD45<sup>+</sup> cells

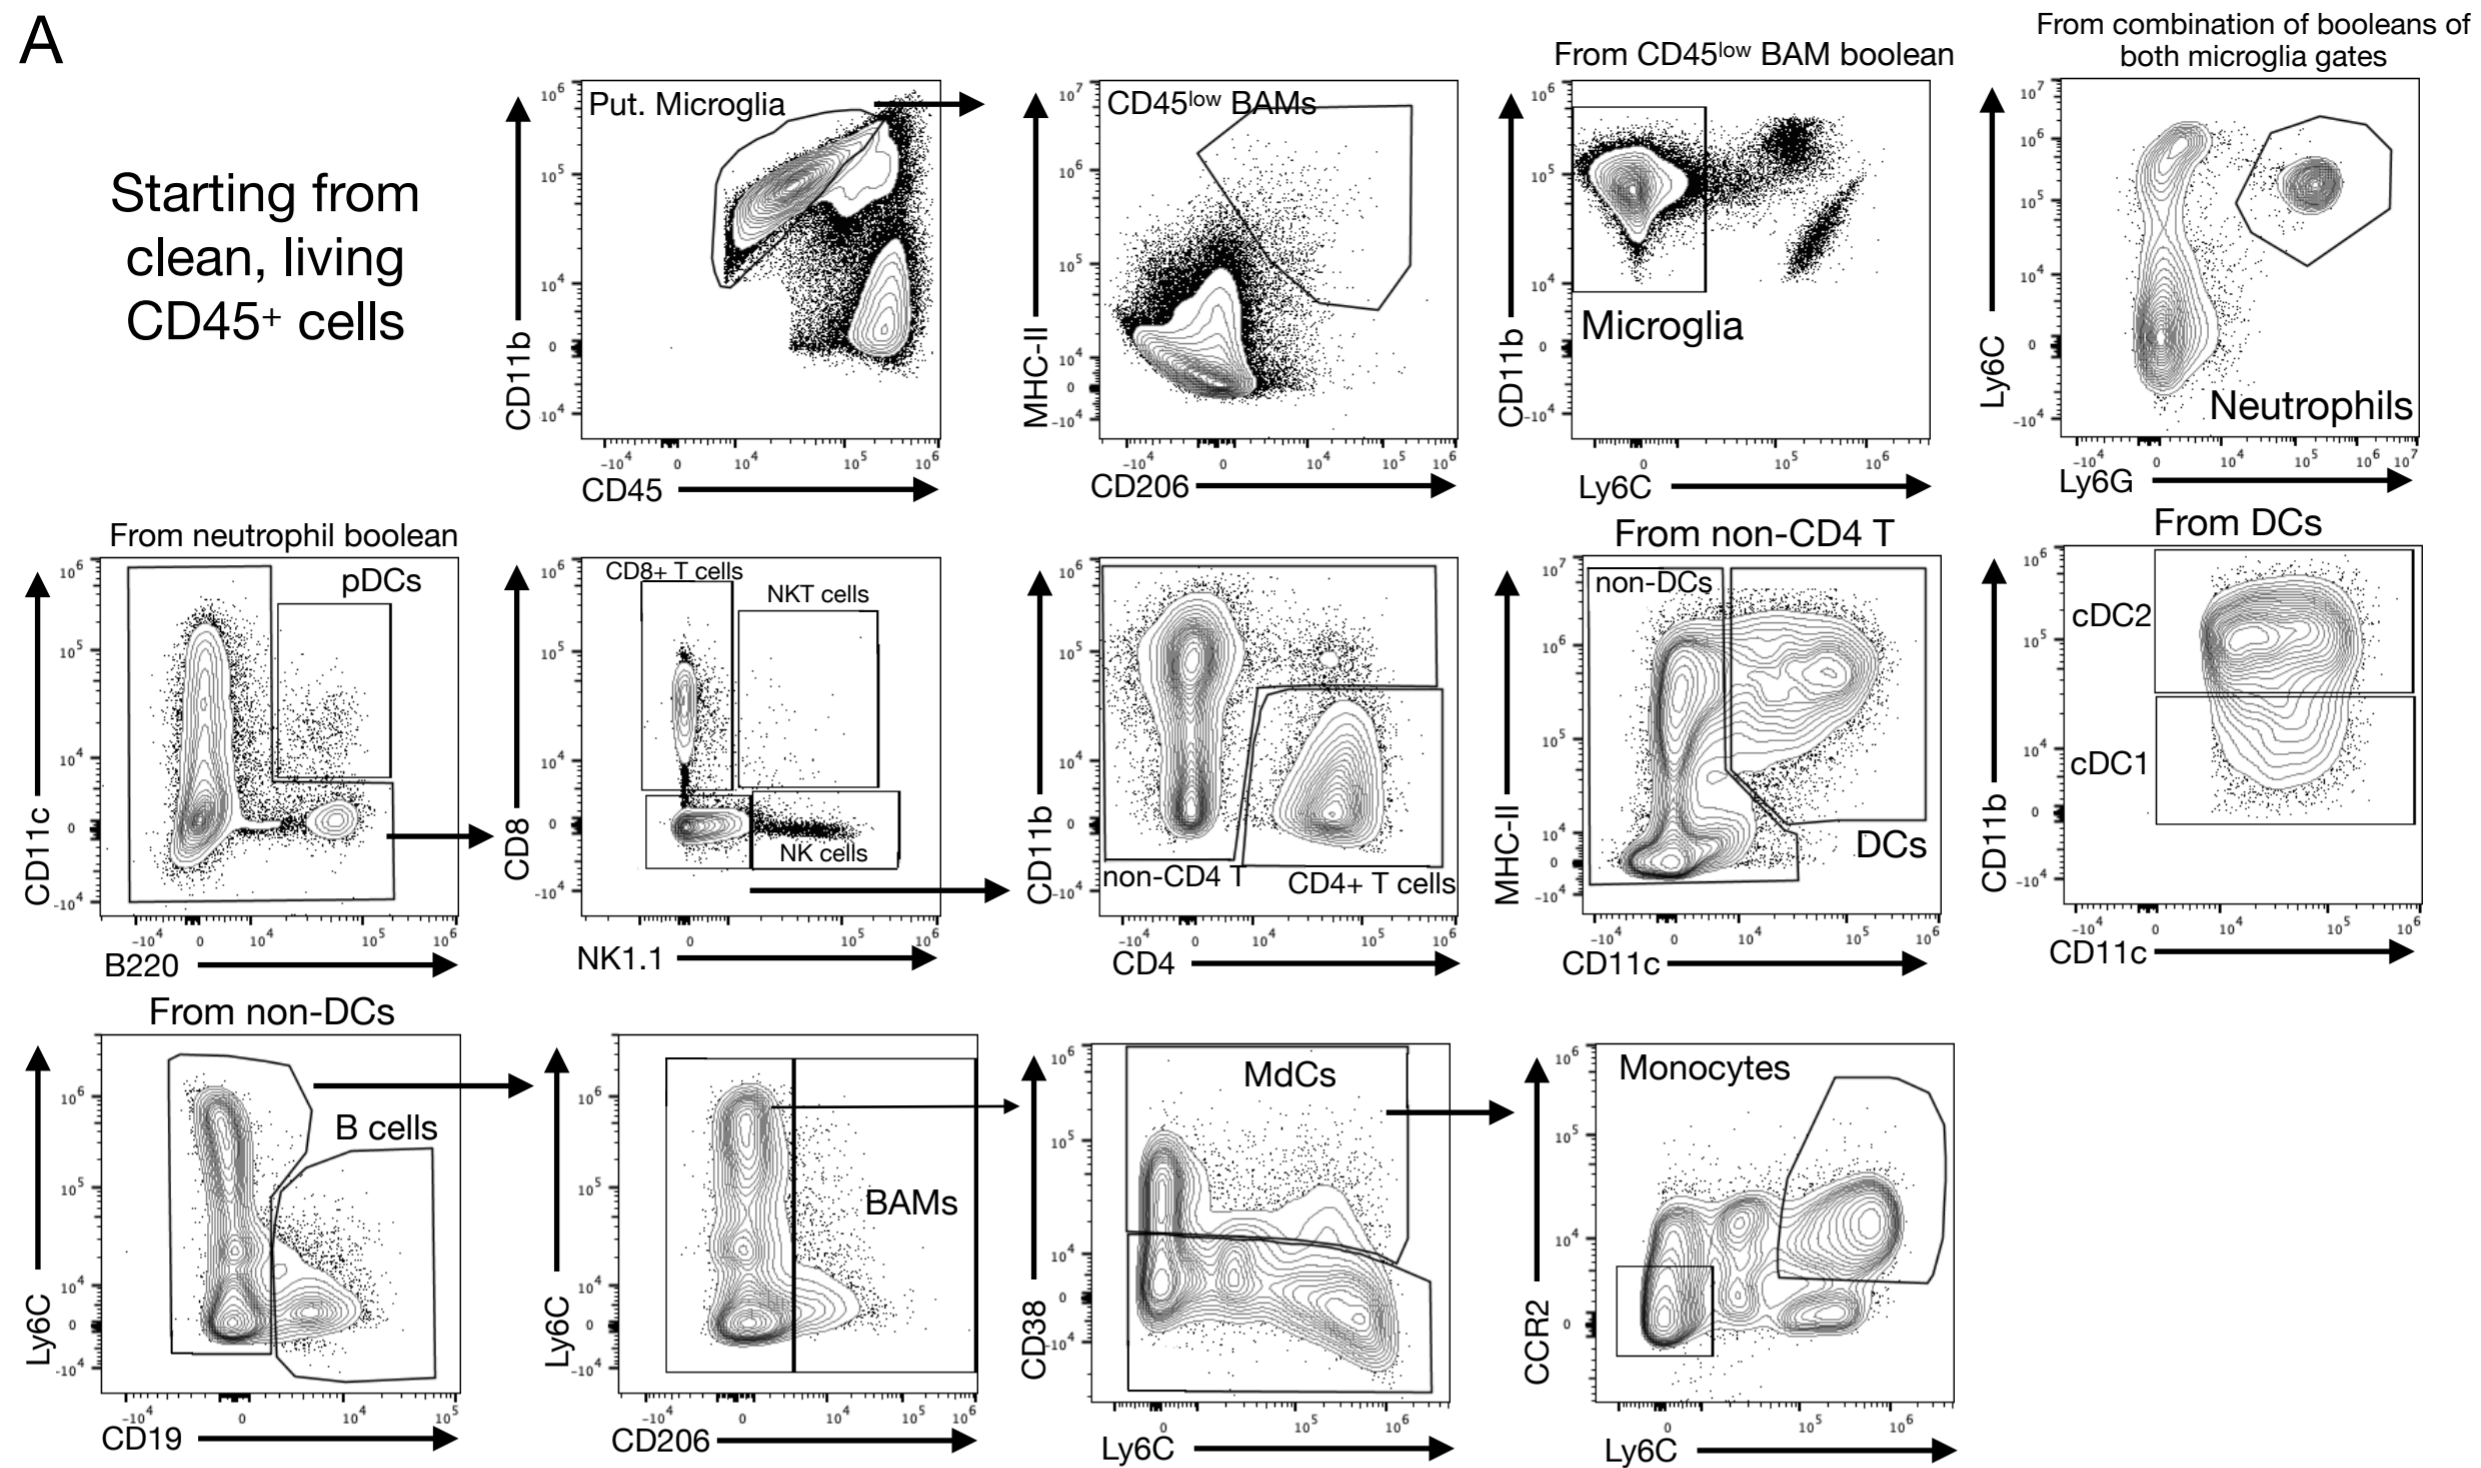

**Figure S2. Gating schemes.** (A) Gating scheme used to manually annotate nearly all CNS immune cell subsets (used in (Fig. 1H) and (Fig. 2F, G)). This gating scheme is able to identify approximately 98% of all CD45<sup>+</sup> CNS immune cells. Put. Microglia, putative microglia; BAM, border-associated macrophage; MdCs, myeloid-derived cells.

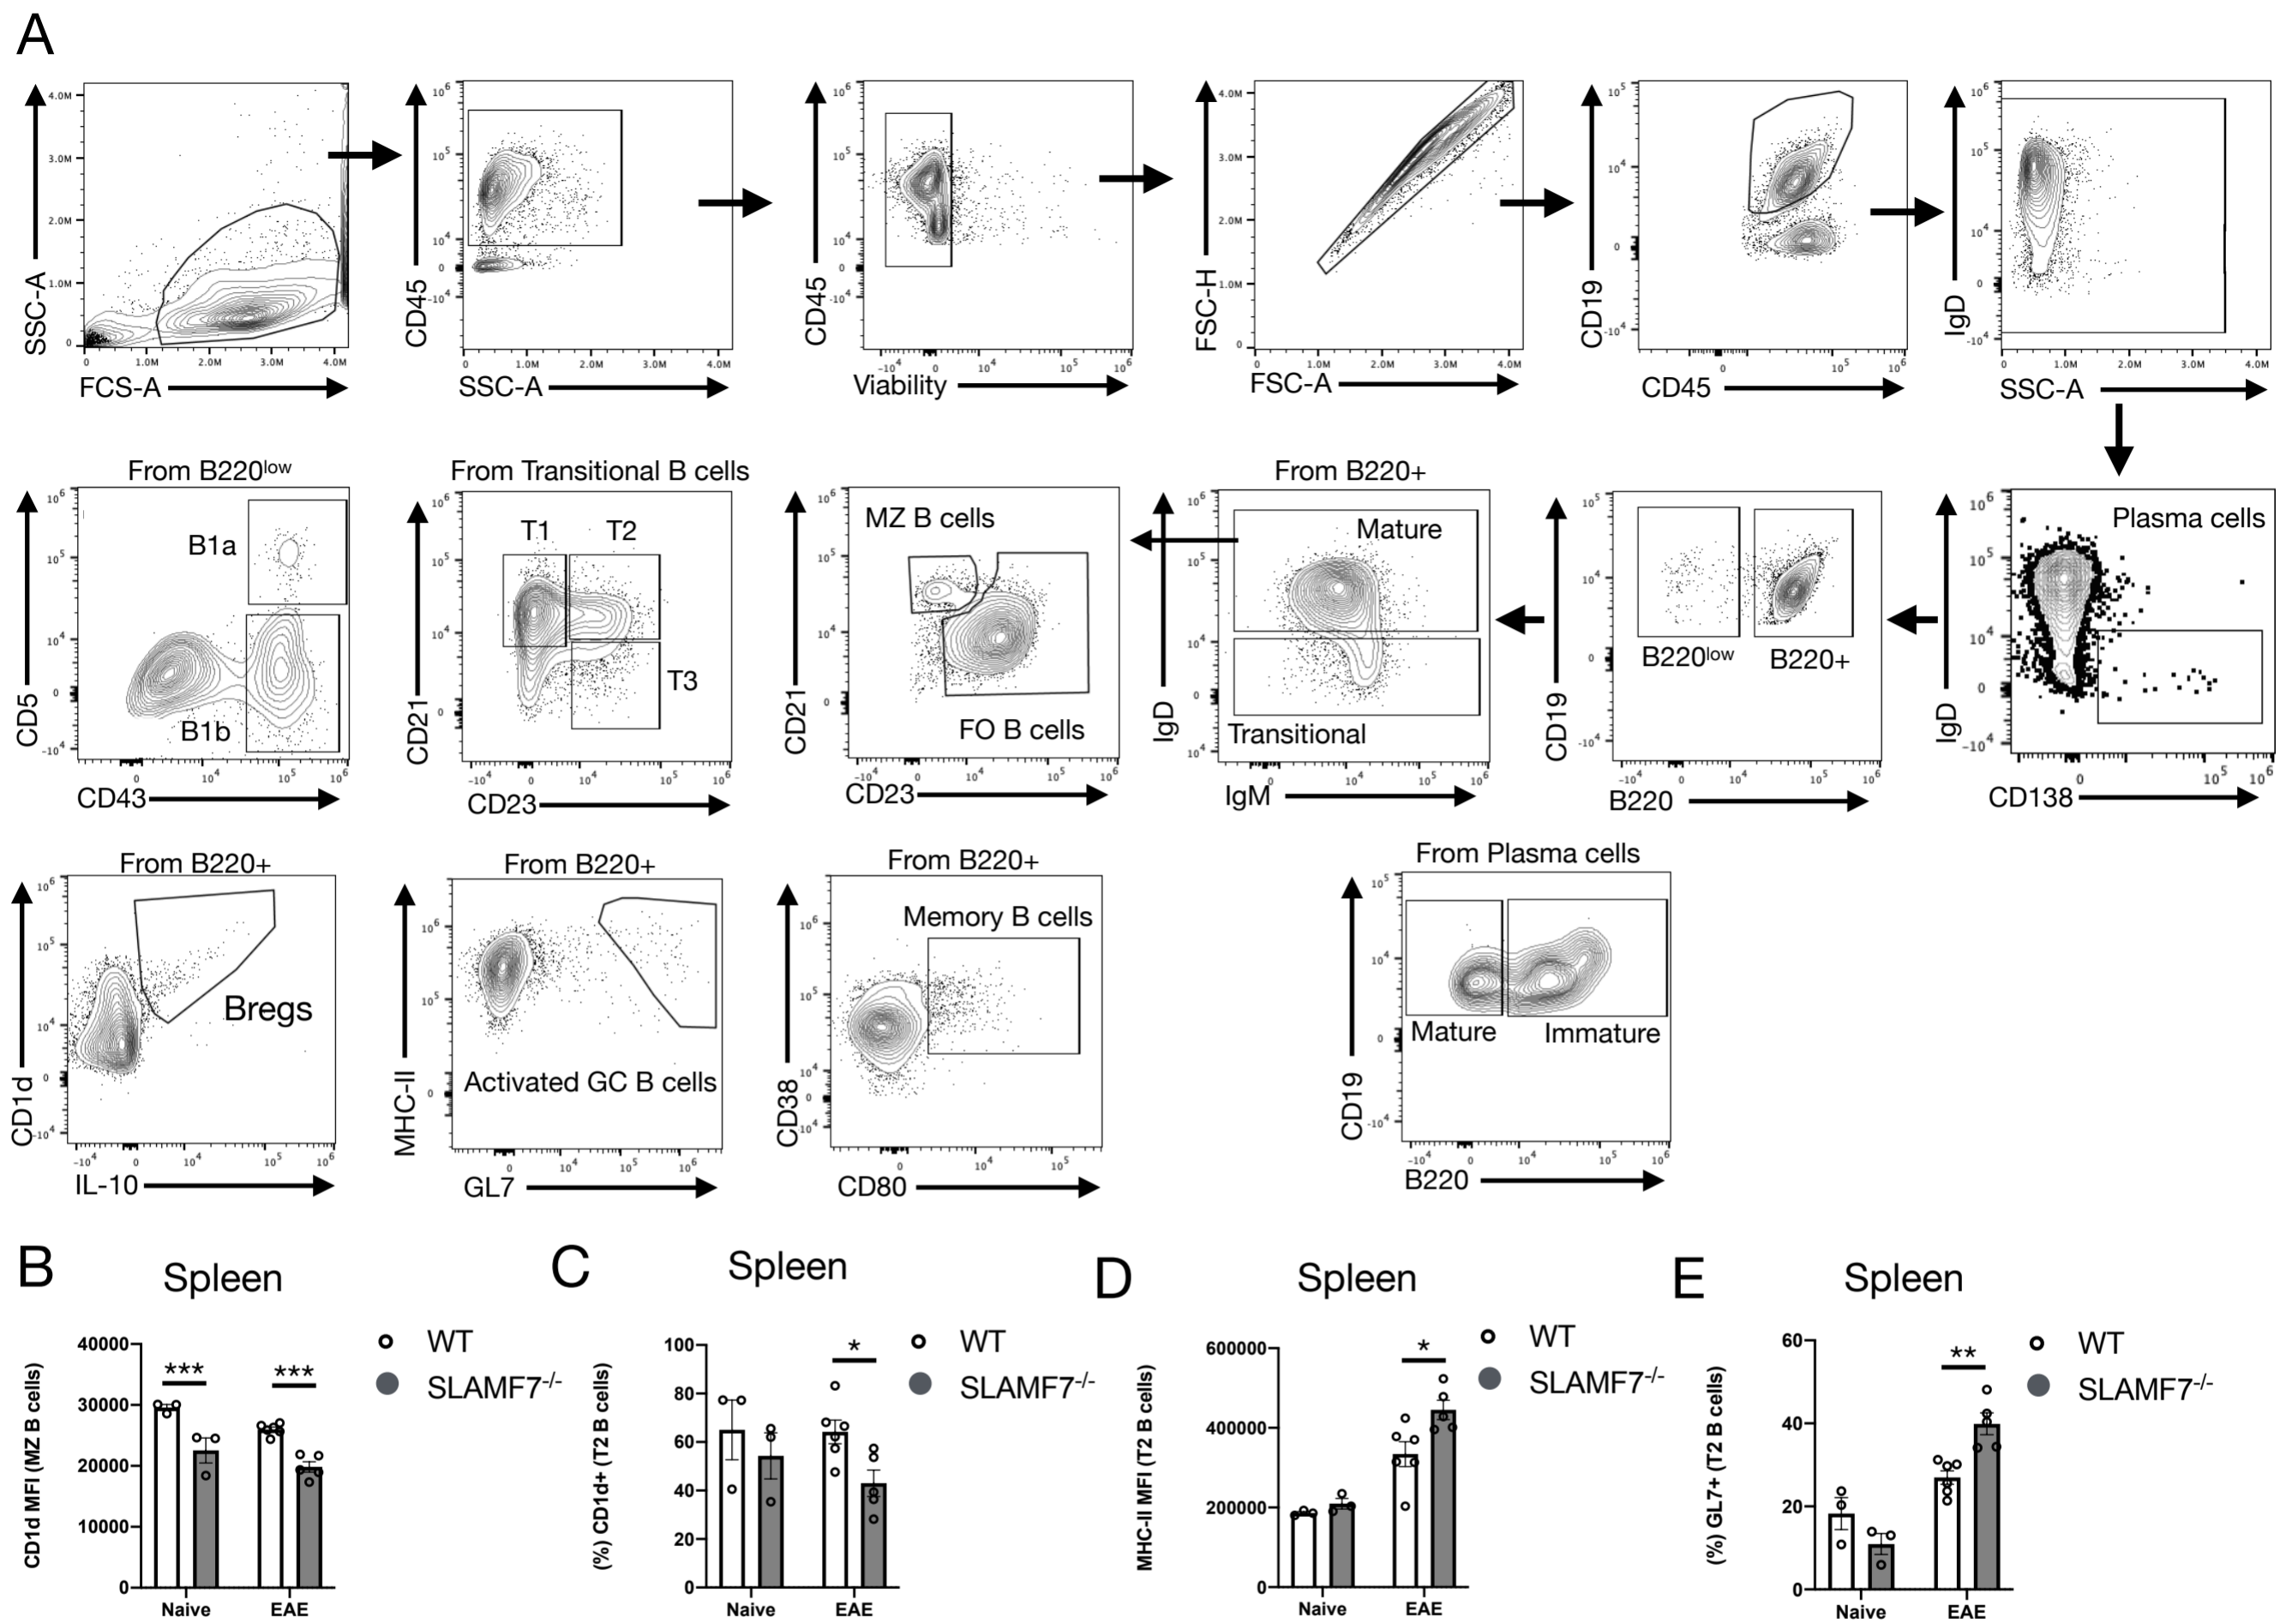

**Figure S3. Gating and additional analyses of B cell deep phenotyping (related to Fig. 5).** (A) Gating scheme used to clean up datasets and manually annotate all CNS and splenic B cell subsets from high dimensional B cell profiling experiments. (B) CD1d expression on MZ B cells. (C) CD1d expression on T2 B cells. (D) MHC-II expression on T2 B cells. (E) GL7 expression on T2 B cells. Groups in (B-E) compared with a two-way ANOVA with Sidak's test for multiple comparisons. FO, follicular; MZ, marginal zone; Bregs, regulatory B cells. \* $p < 0.05$ , \*\* $p < 0.01$ , \*\*\* $p < 0.001$ .

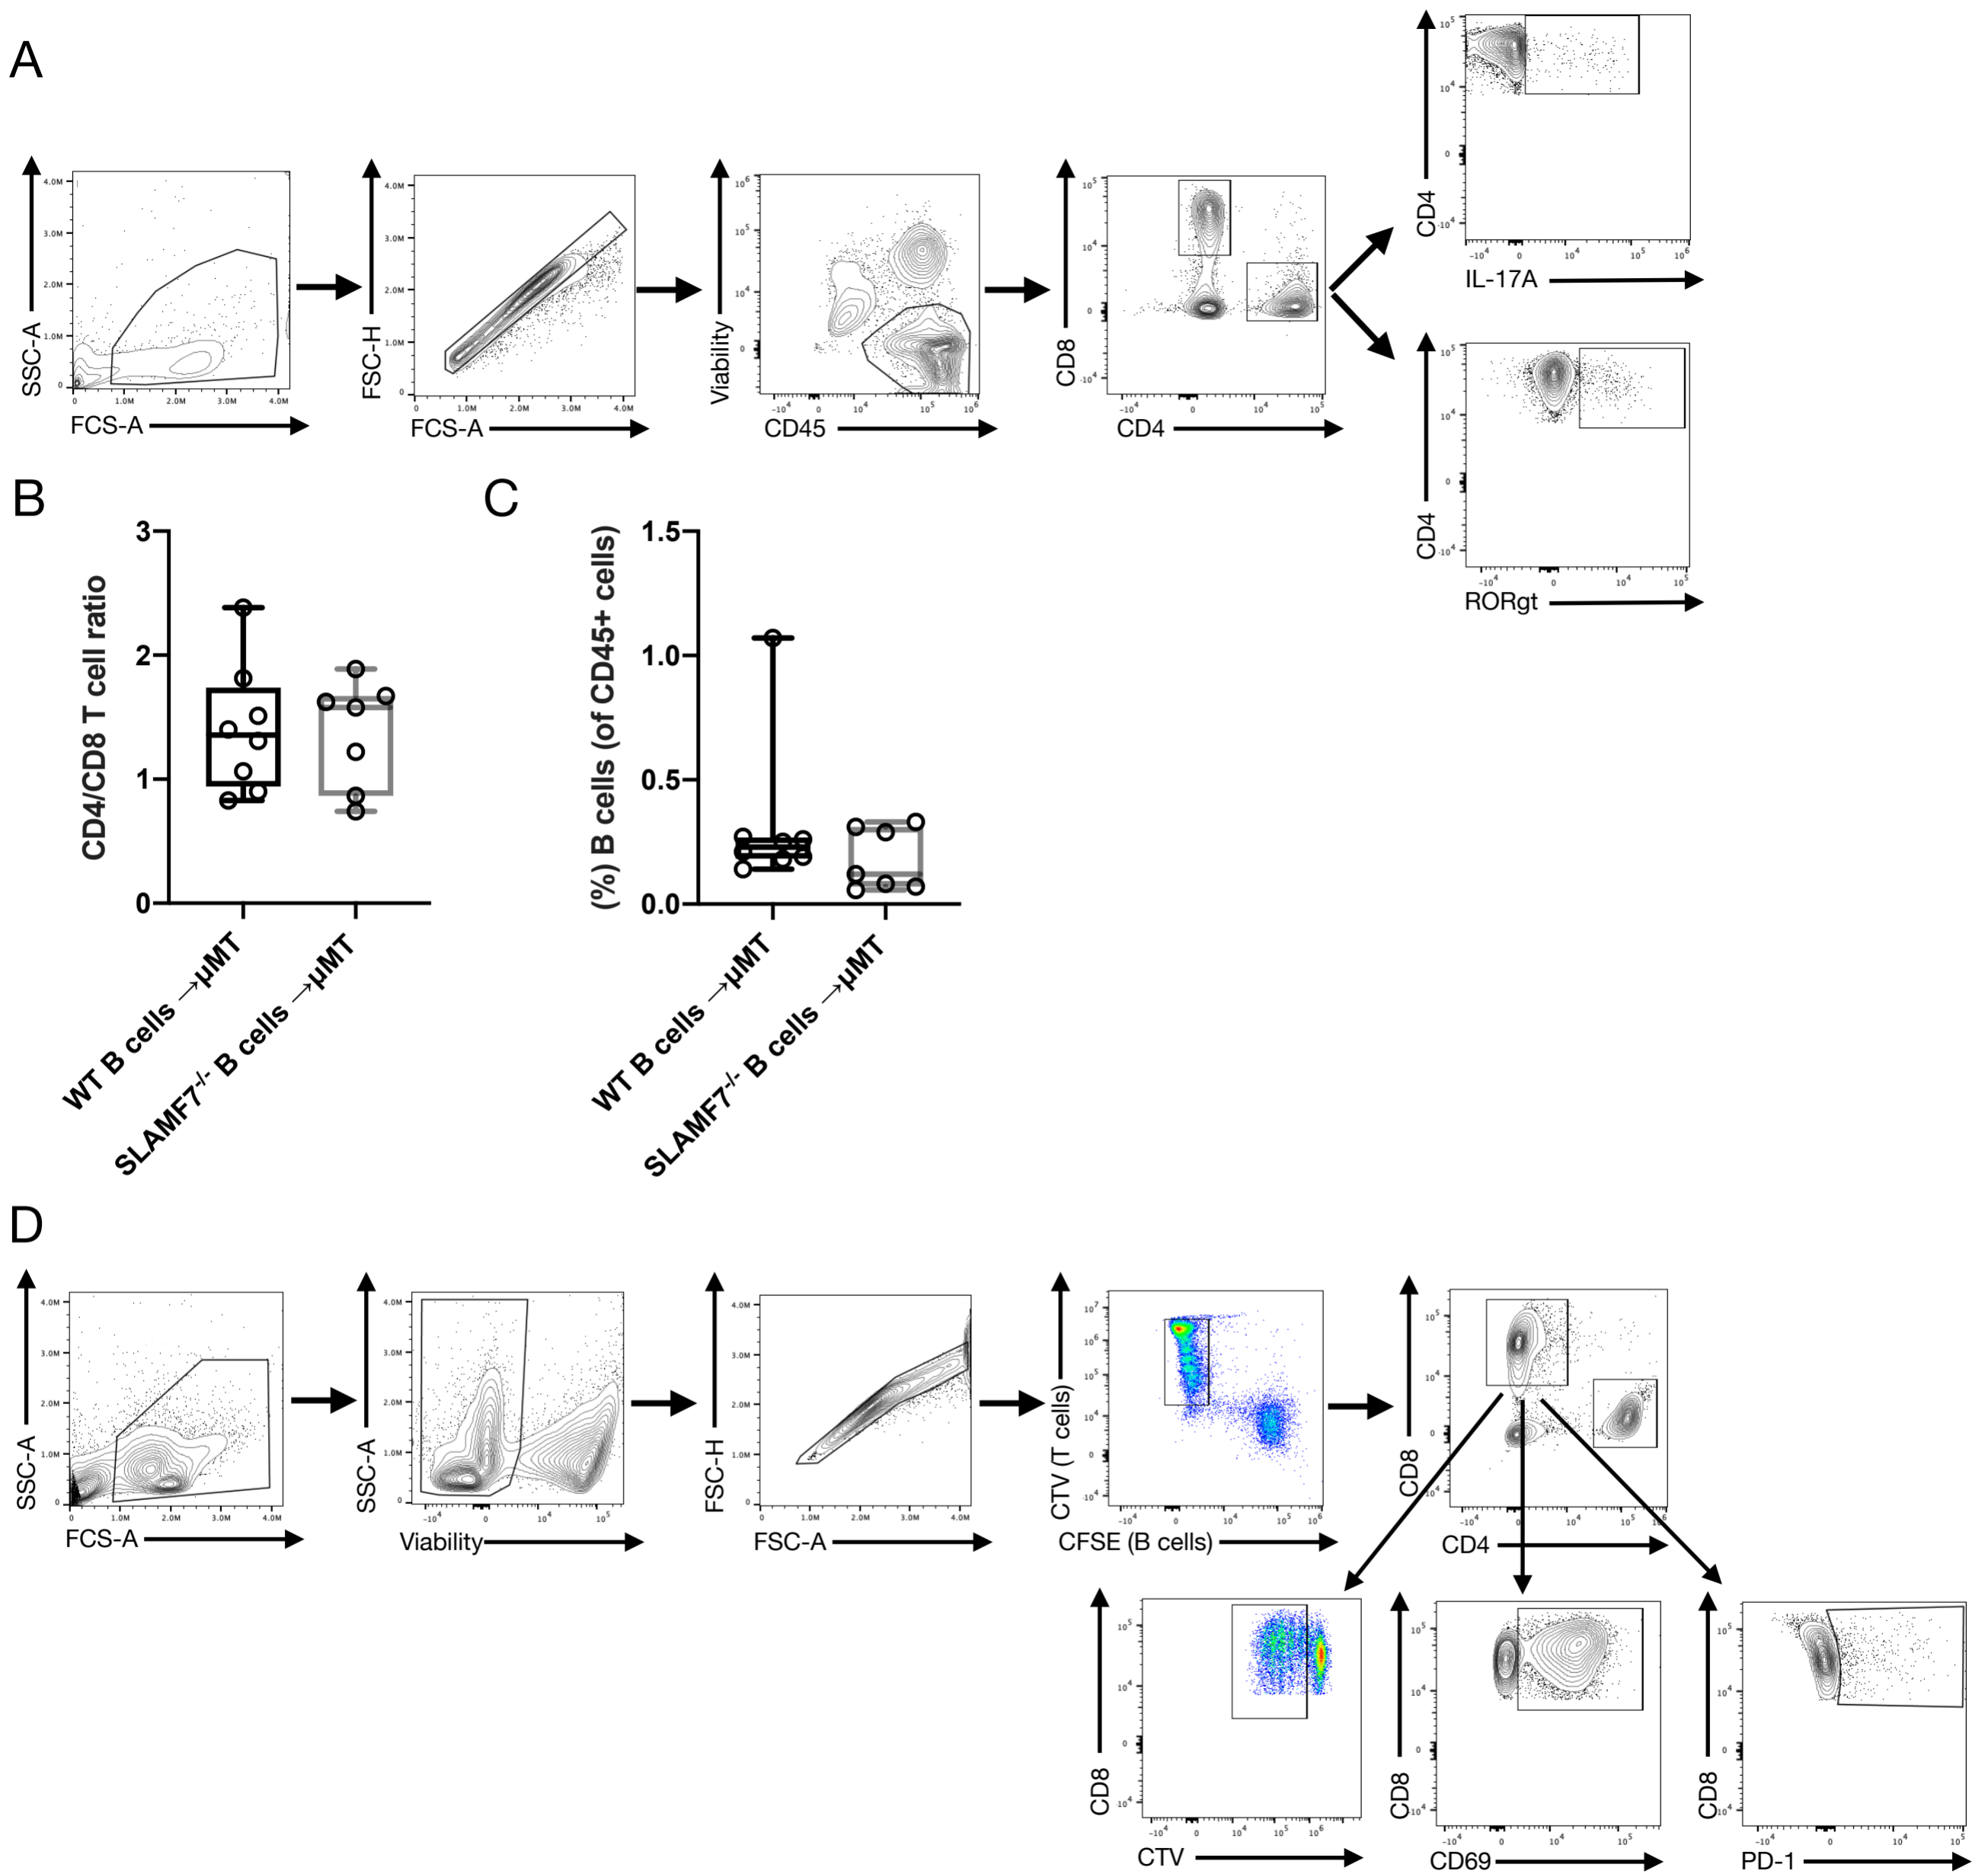

**Figure S4. Gating schemes (related to Fig. 6).** (A) Gating scheme used to identify IL-17A<sup>+</sup> and RORgt<sup>+</sup> CD4<sup>+</sup> T cells in  $\mu$ MT mice (used in (Fig. 6B, C)). (B) CD4/CD8 T cell ratio in the CNS of mice  $\mu$ MT mice. (C) Frequency of B cells in the CNS of  $\mu$ MT mice. (D) Gating scheme used to measure CD8<sup>+</sup> T cell phenotypes from co-culture experiments (used in (Fig. 6L-N)).
